# Supplementary material for: Uncovering missing pieces: duplication and deletion history of arrestins in deuterostomes
Source: PubMed Central journal article supplement (PMC5501109; doi:10.1186/s12862-017-1001-4), 2017-07-06
Supplement: 12862_2017_1001_MOESM1_ESM.pdf [file 12862_2017_1001_MOESM1_ESM.pdf]

## Additional file 1

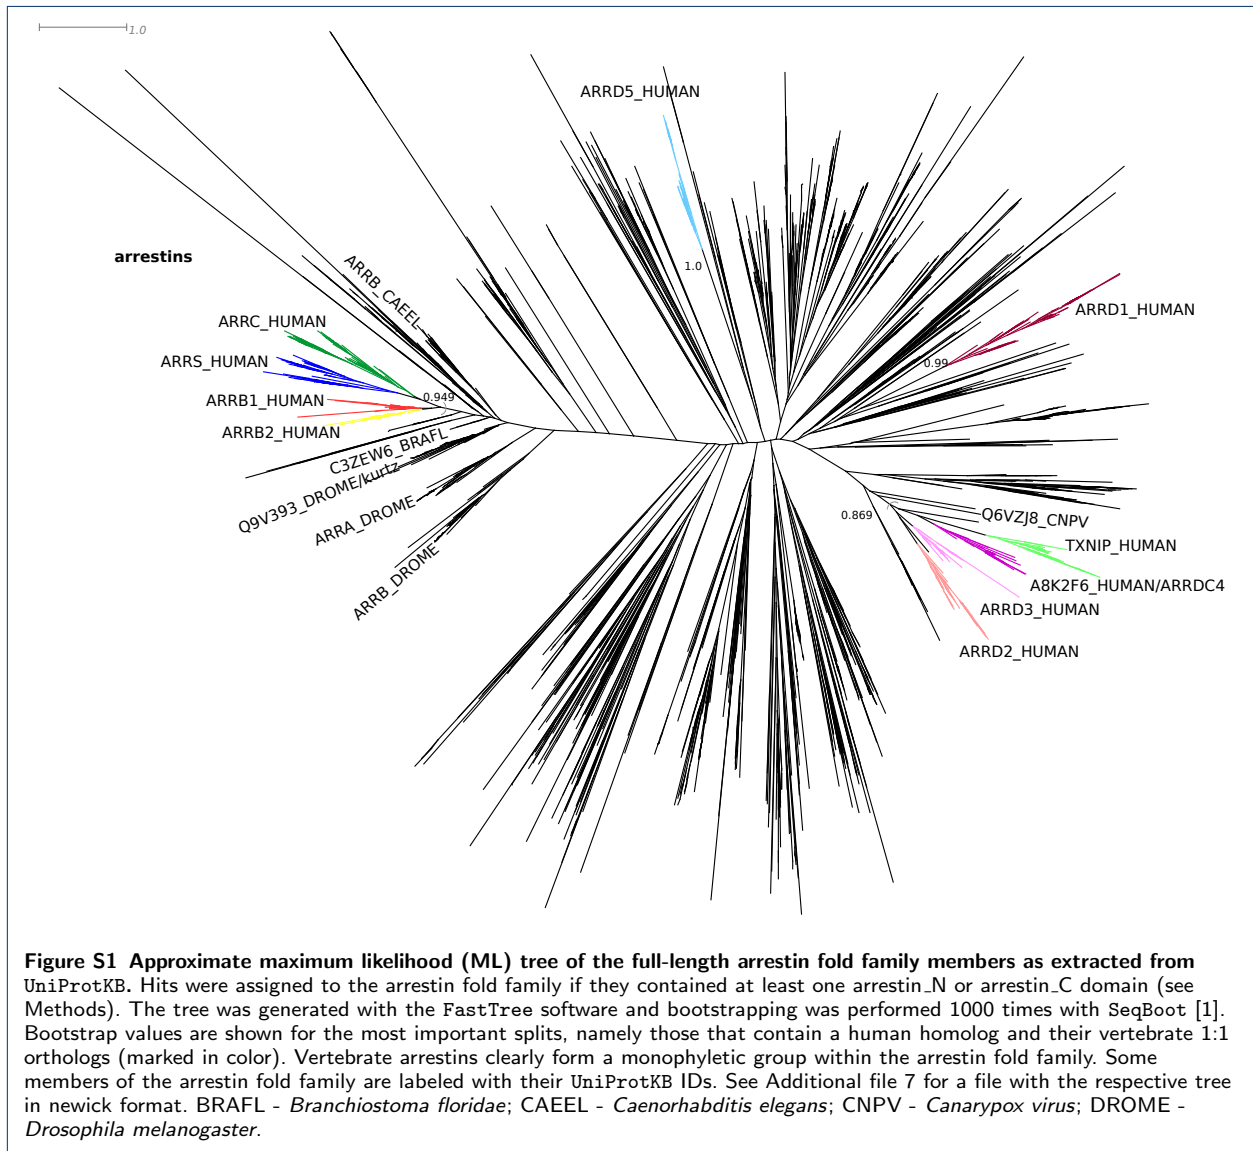

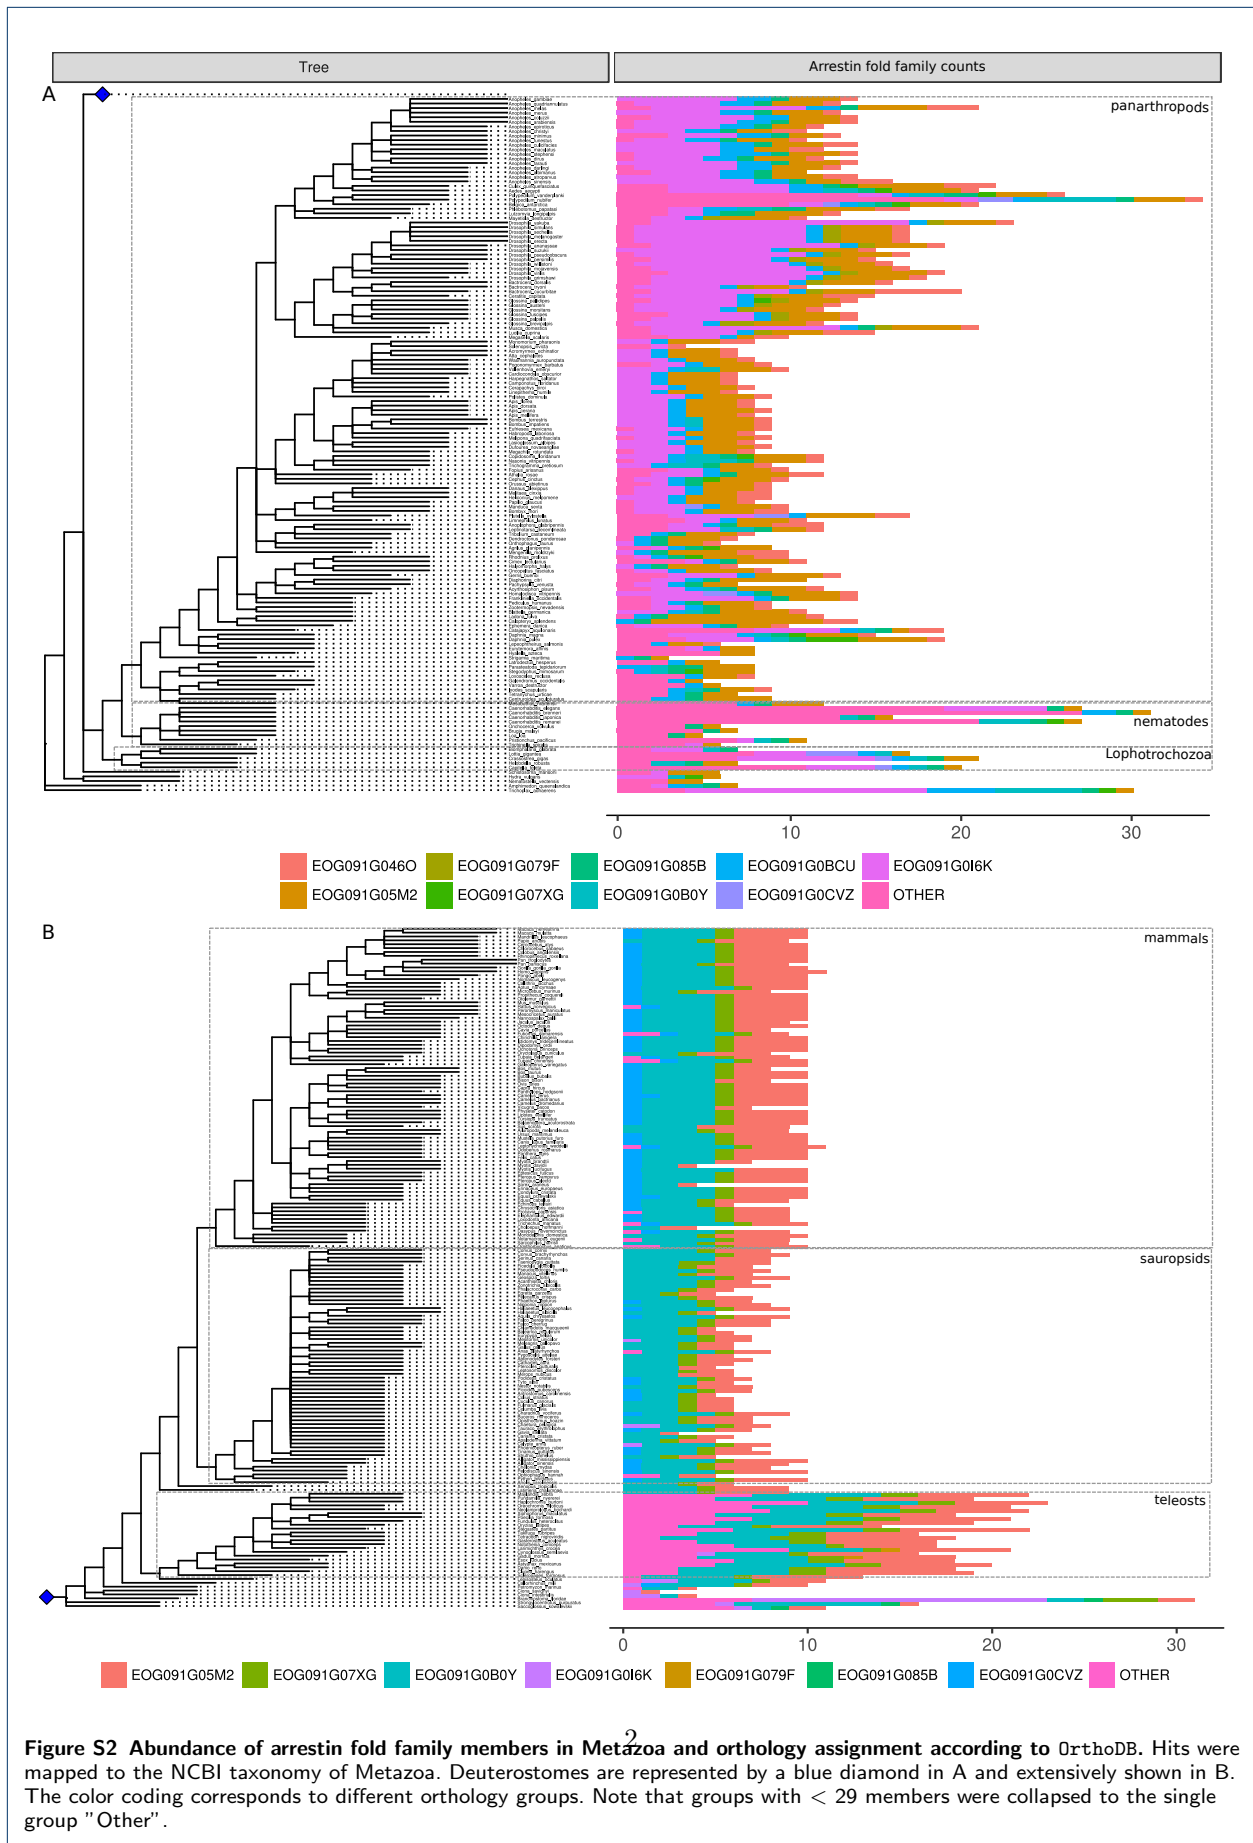

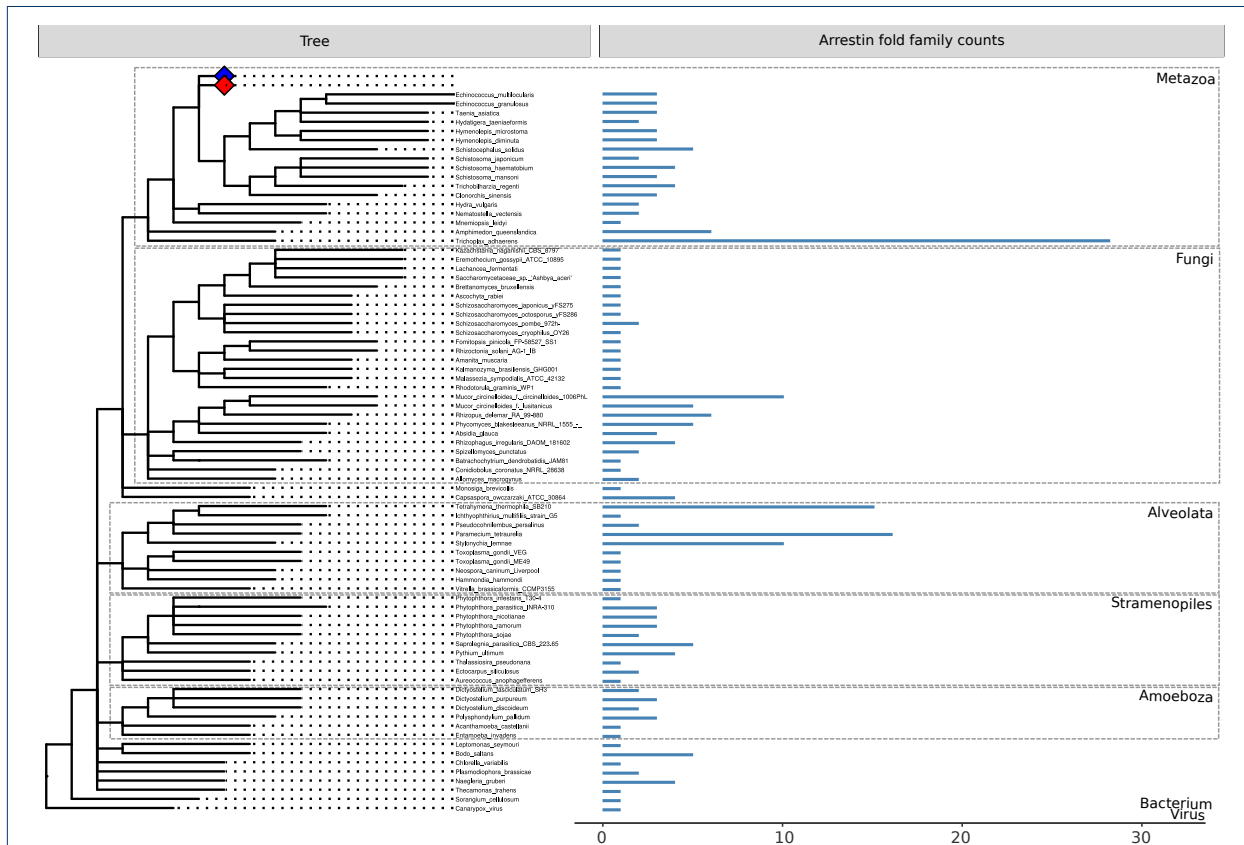

**Figure S3** Abundance of arrestin fold family members in different domains of life according to UniProtKB. Hits were assigned to the arrestin fold family if they contained at least one arrestin\_N or arrestin\_C domain (see Methods) and were mapped to the NCBI taxonomy. The blue and red diamond simplify the groups of protostomes and deuterostomes, respectively (see Fig. 4 for details).

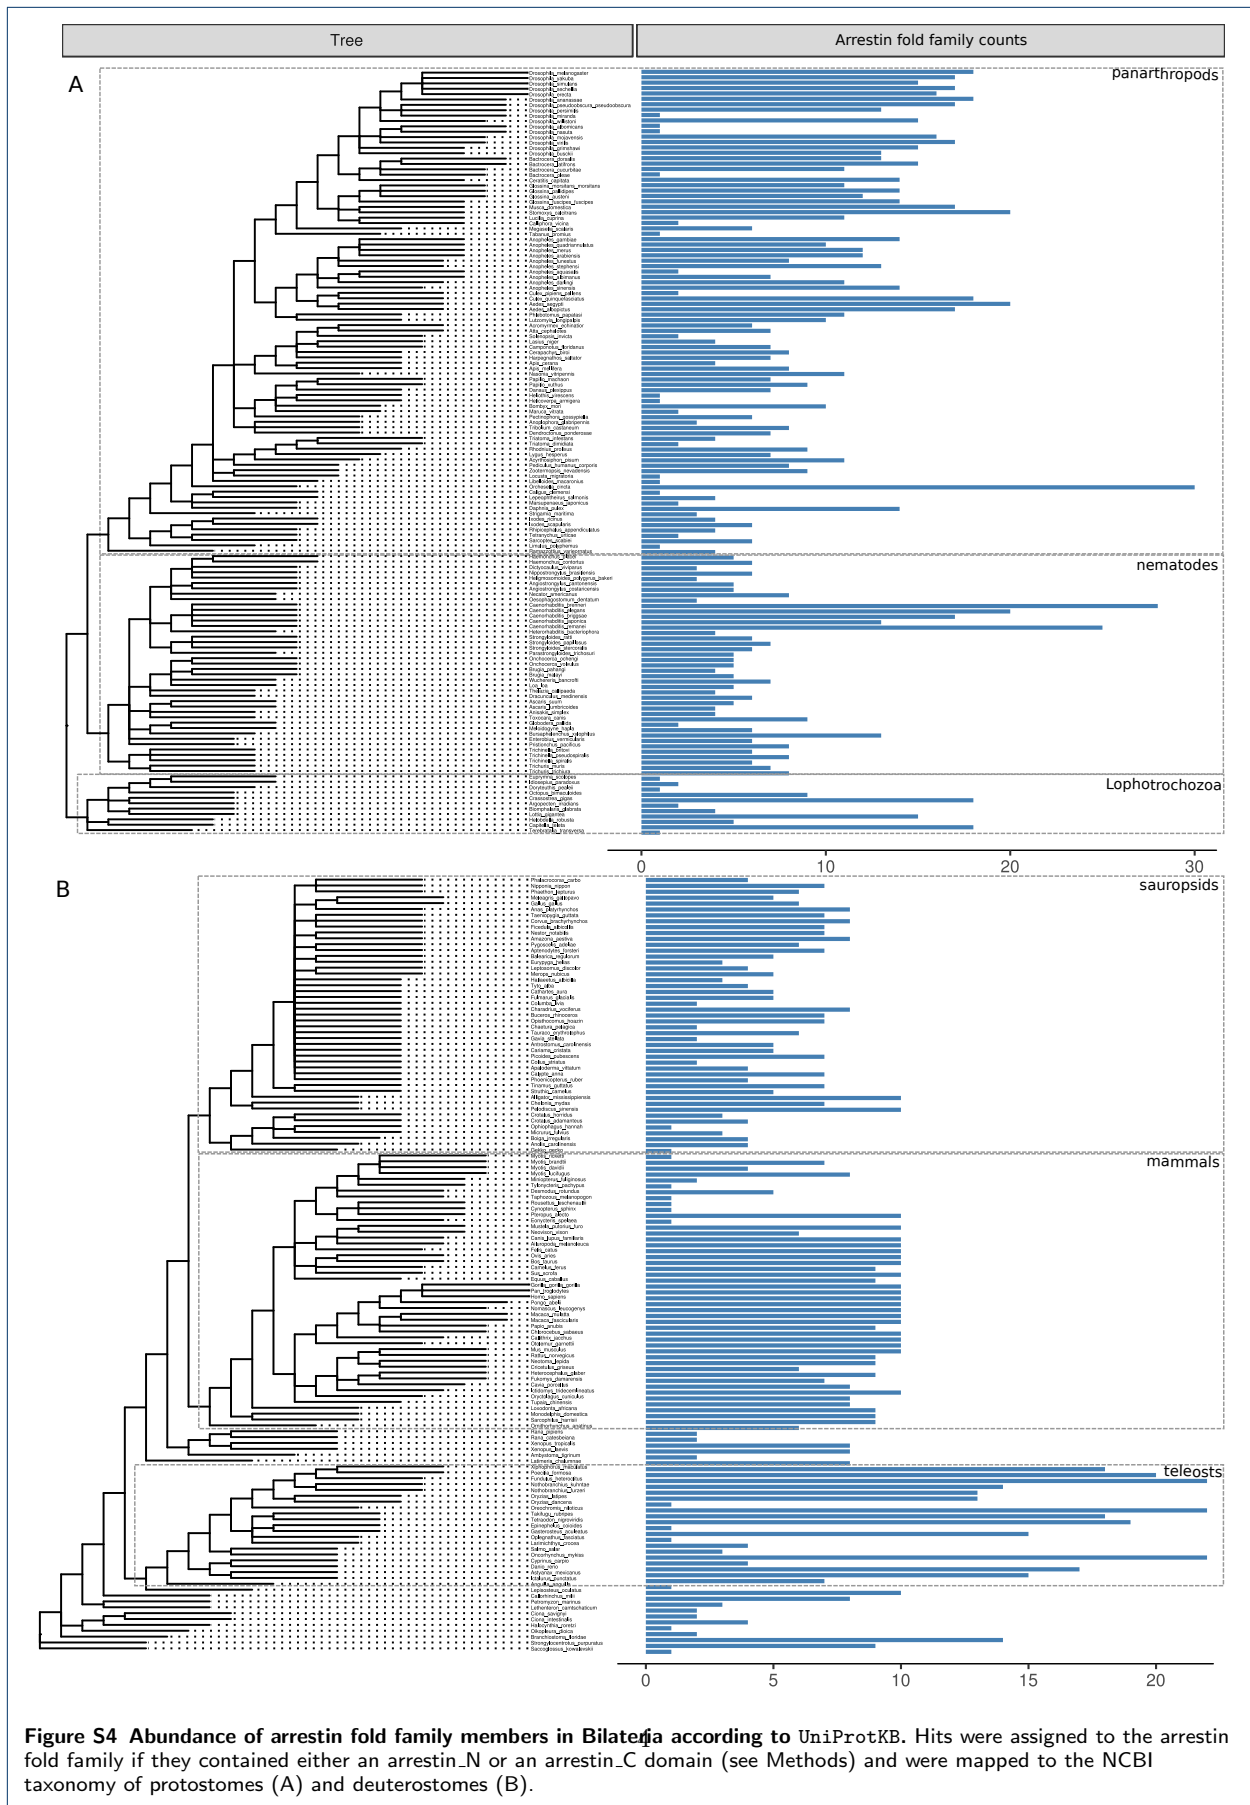

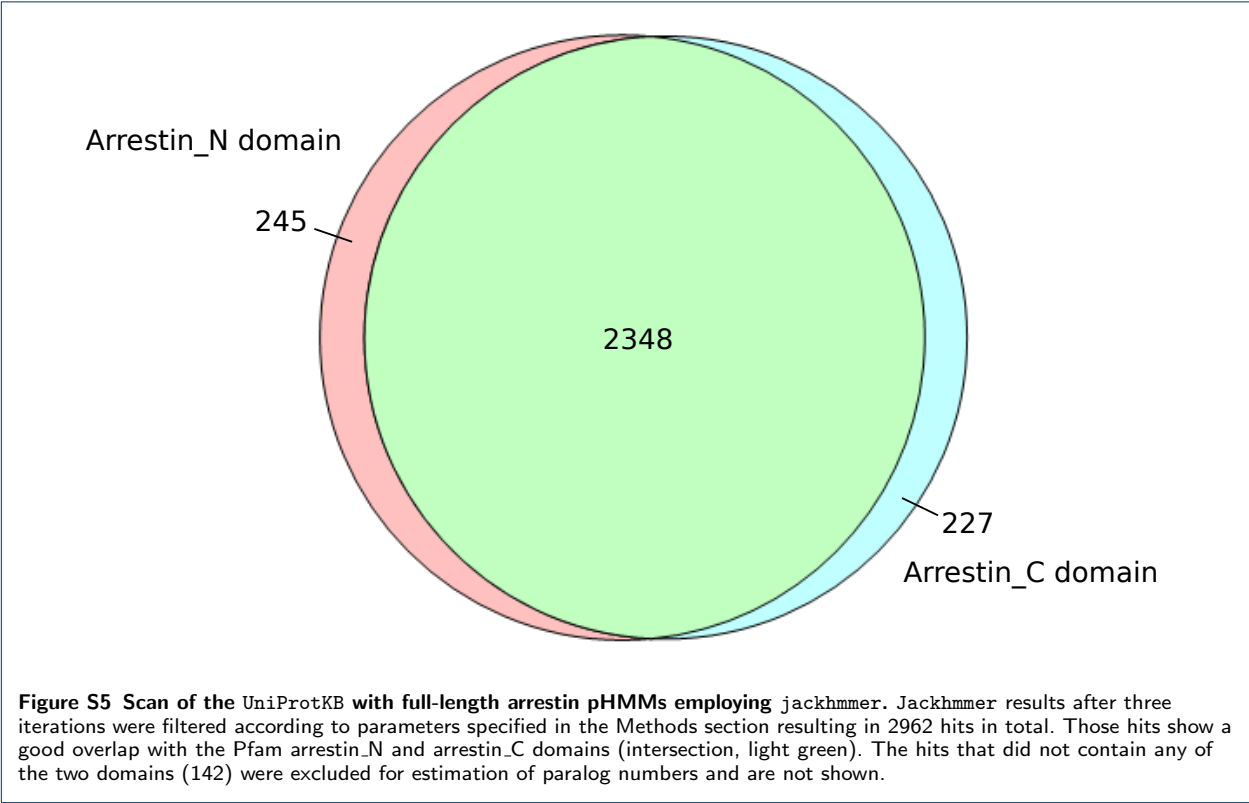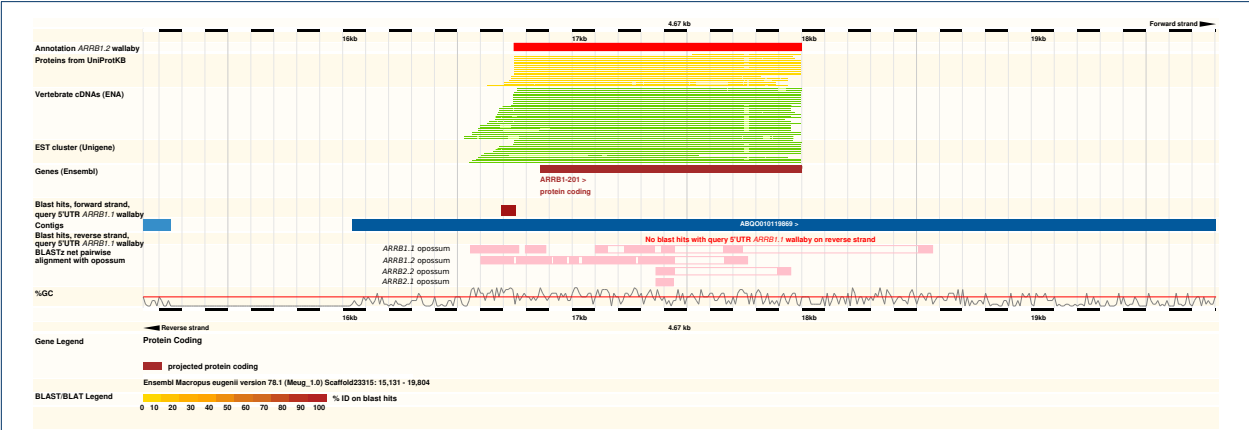

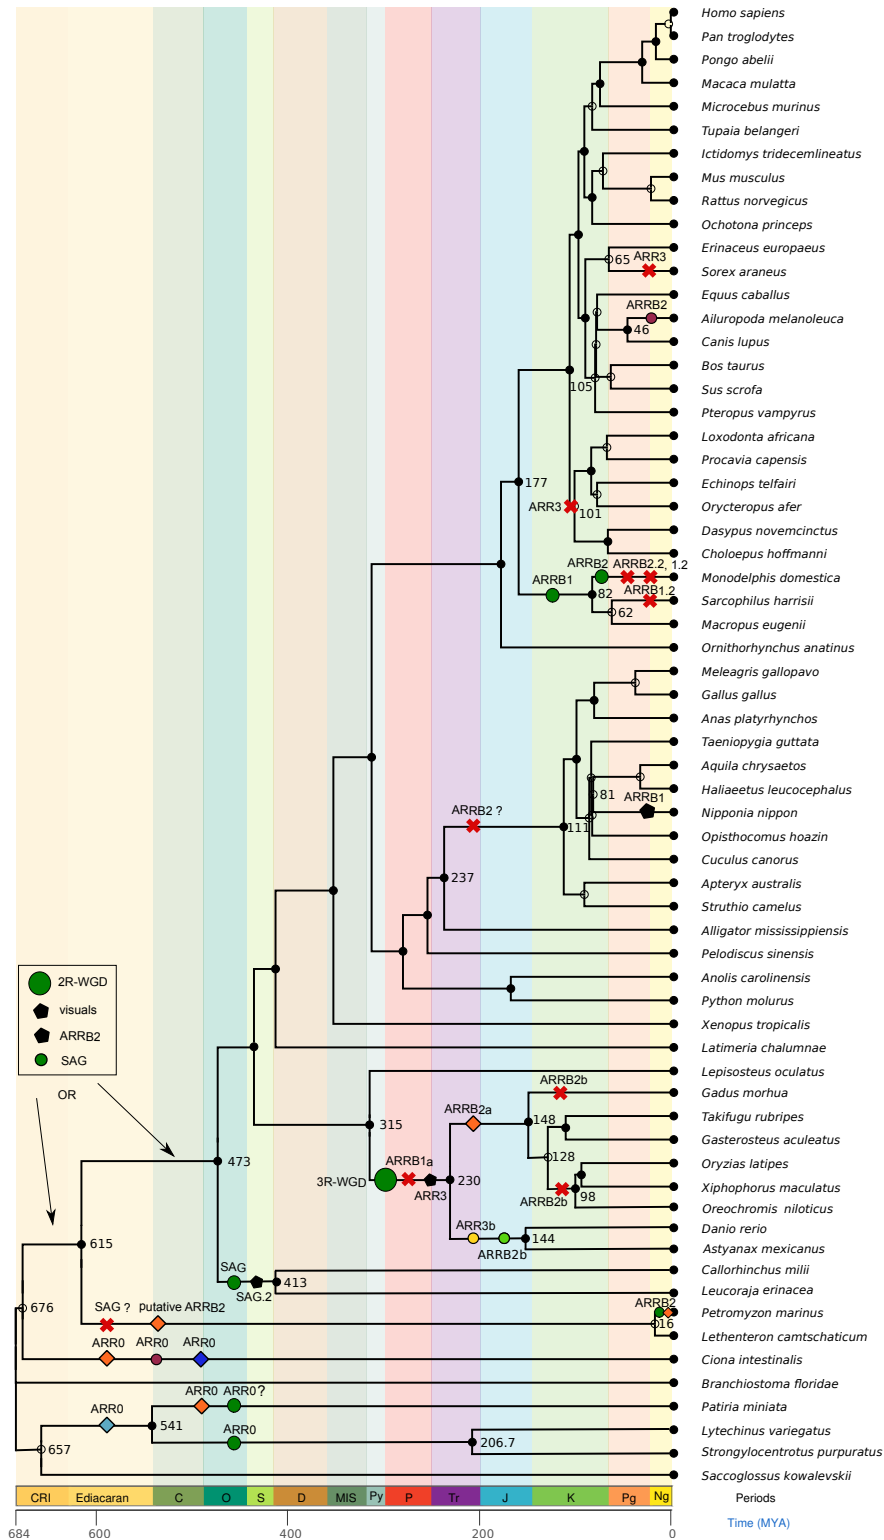

**Figure S7 Summary of arrestin gene, exon and intron gain and loss events in deuterostomes.** All events as inferred in this study were mapped onto a timed species tree [2], which allows for estimation of the time frame when those events happened. Trifurcations are labeled with the estimated speciation time, whenever events happened on nearby branches. Crosses and dark green dots indicate gene duplication and loss events, while colored diamonds, dots and pentagons on tree branches symbolize intron gain, intron loss and exon loss events, respectively. Gene duplications are often accompanied by gene structure changes. Arrestin genes in marsupials duplicated by retrotransposition, which also resulted into change of the gene structure (loss of all introns). Please see Fig. 10 in the main document for details on changes of the gene structure as well as color code. Note that events on the specific branches are placed arbitrarily regarding order and exact timing. Insertion of intron 85c in bat star must have occurred before duplication of *ARR0*, which is assumed to have happened very recently. The figure was created using the timetree webserver. MYA - million years ago; WGD - whole genome duplication; CRI - Cryogenian; C - Cambrian; O - Ordovician; S - Silurian; D - Devonian; M - Mississippian; Ps - Pennsylvanian; P - Permian; Tr - Triassic; J - Jurassic; K - Cretaceous; Pg - Paleogene; Ng - Neogene.

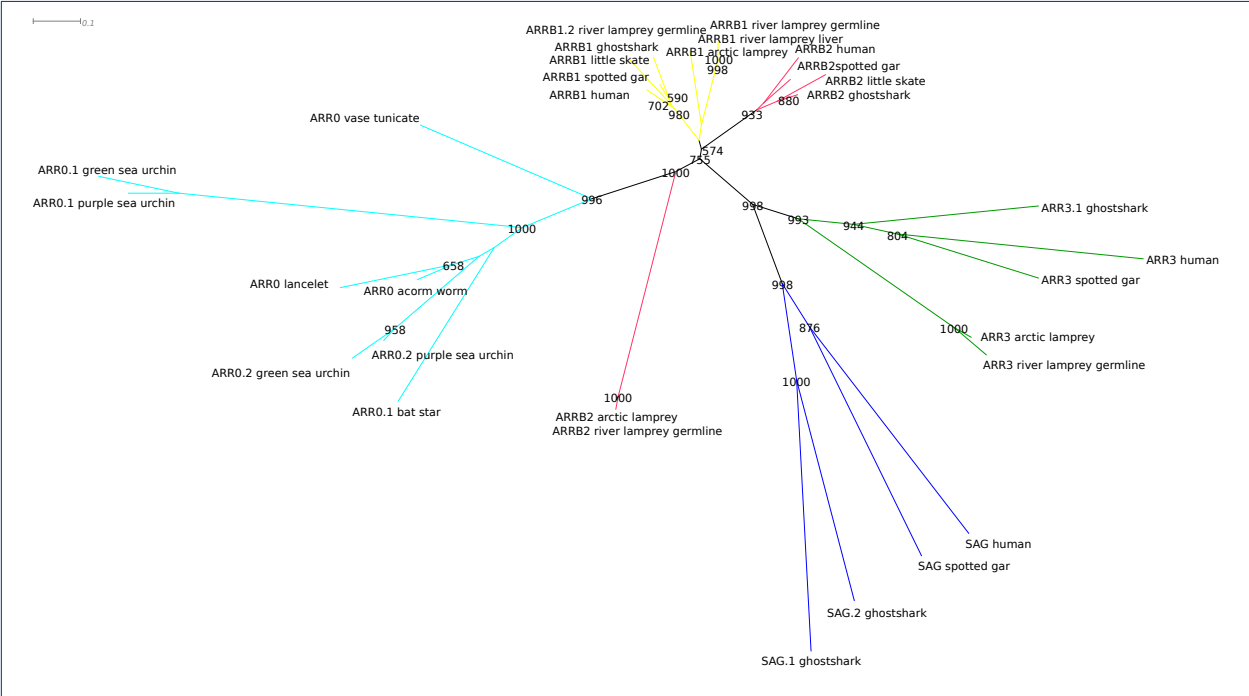

**Figure S8** Maximum likelihood (ML) tree of arrestins from basal deuterostomes and human (lobe-finned fish) and spotted gar, a representative of bony fish. The tree was constructed from an amino acid alignment using PhyML (model LG+G with  $\alpha$  0.77 and 1000 bootstraps). The different monophyletic and well-supported orthology groups are highlighted in different colors. Bootstrap values are shown if support was 50..100%. The phylogenetic tree was visualized with Dendroscope 3.5.7 [3].

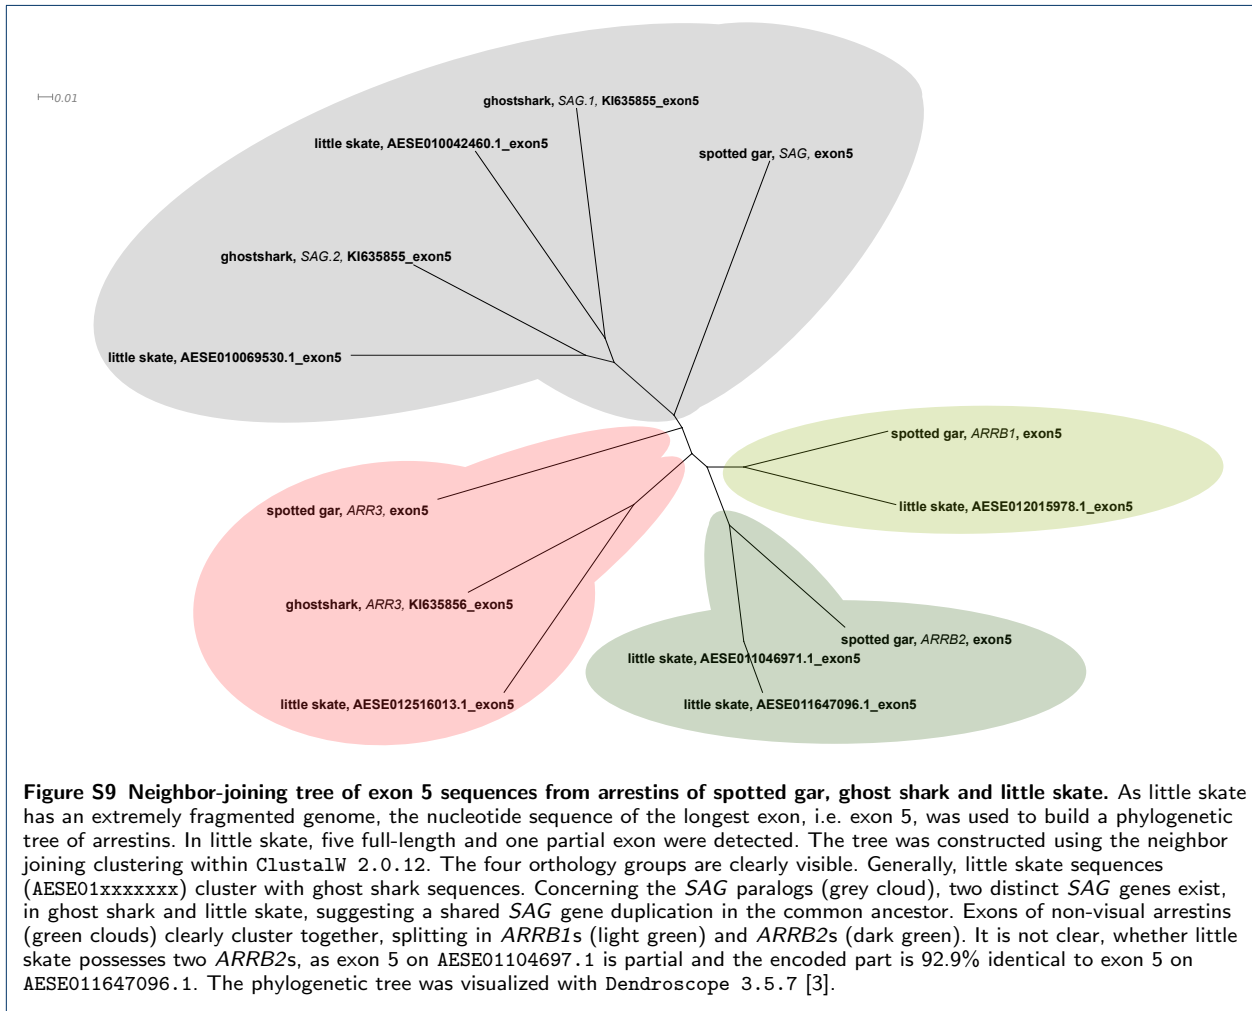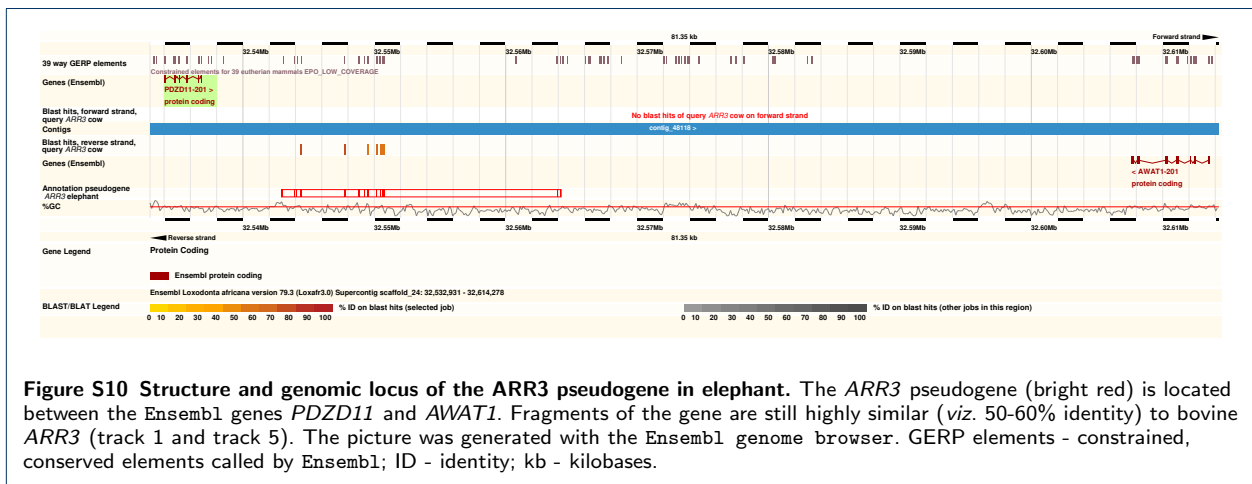



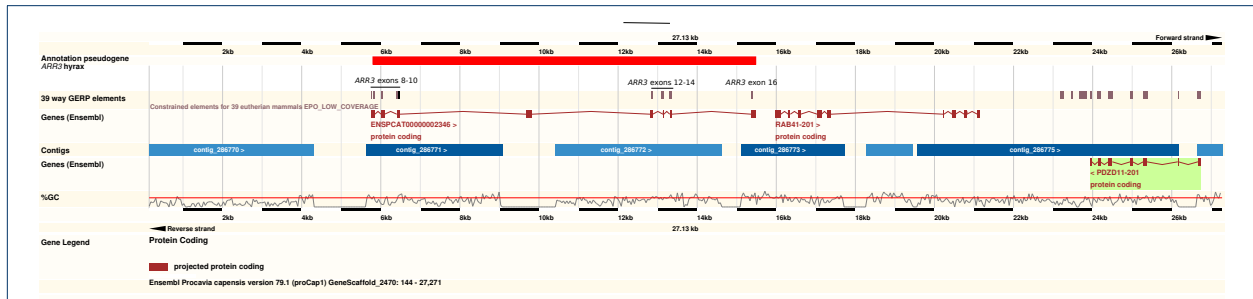

**Figure S11** Genomic locus of the *ARR3* pseudogene in hyrax. The respective locus was identified by investigation of the *PDZD11* (green box) neighborhood. No blast hits were retrieved with *ARR3* from cow as query. Nevertheless, there is sequence similarity to exons 8-10, exon 12-14 and exon 16 as indicated by high GERP conservation scores that point to *ARR3* in different eutherian mammals. The novel-protein coding gene ENSPCAT0000002346 that is annotated by Ensembl at this locus has an arrestin\_C domain (PF02752). Besides the missing arrestin\_N domain, attempts to annotate the C terminal part of arrestin in this region with ProSpLign results in an annotation with two stop codons within exons, a frame shift and the need to annotate several non-canonical splice sites. The whole respective region is marked in bright red. The picture was generated with the Ensembl genome browser. GERP elements - constrained, conserved elements called by Ensembl; ID - identity; kb - kilobases.

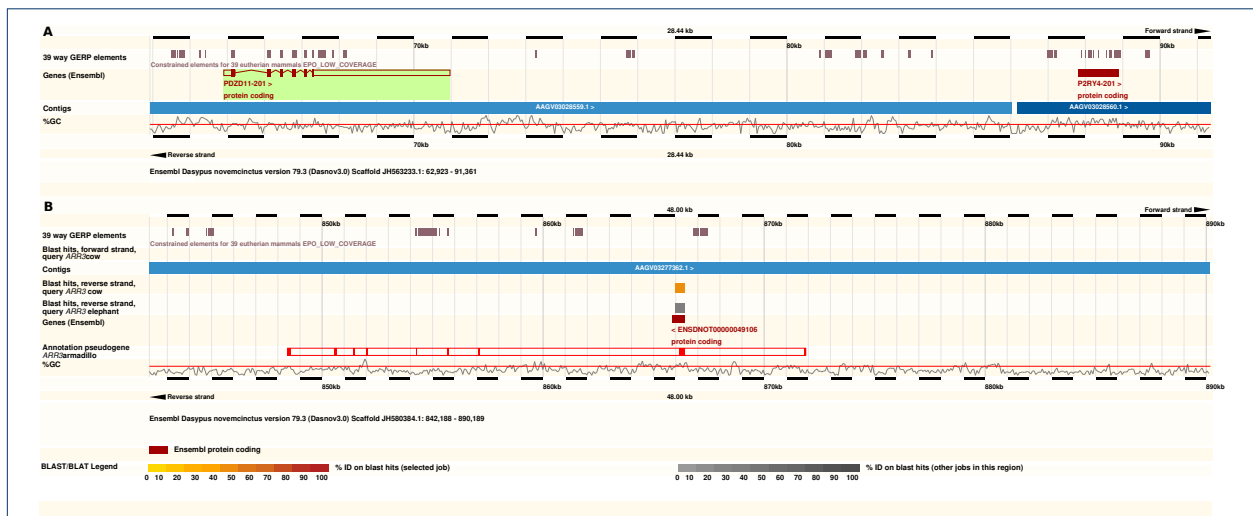

**Figure S12** Candidate loci and genes for *ARR3* in armadillo. A - The genomic region between *PDZD11* (green box) and *P2RY4* of armadillo has no similarity to bovine *ARR3*. B - Instead, bovine *ARR3* returned a blast hit on JH580384.1 overlapping the Ensembl gene ENSDNOT00000049106 that has an arrestin\_N domain (PF00339). Annotation attempts using ProSpLign resulted in annotation of a hypothetical pseudogene (bright red) that contains 3 internal stop codons and 3 frame shifts. The picture was generated with the Ensembl genome browser. GERP elements - constrained, conserved elements called by Ensembl; ID - identity; kb - kilobases.

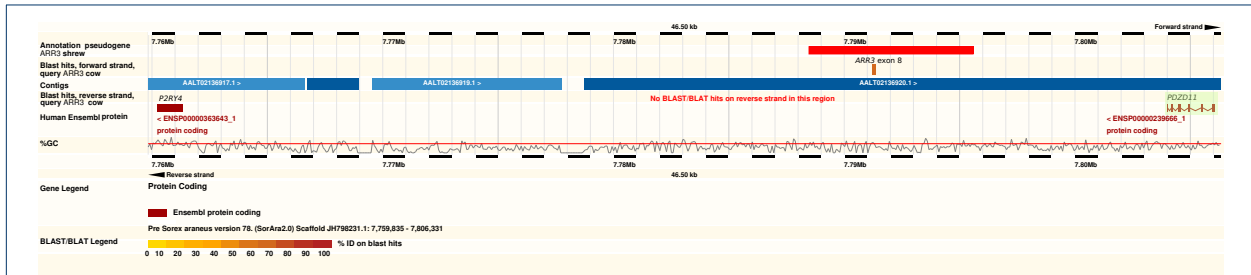

**Figure S13 Genomic locus of the *ARR3* pseudogene in shrew.** The respective locus next to *PDZD11* was identified by tblastn of bovine *ARR3* against the shrew genome (green box). Homology search using *ARR3* from dog, human and mouse revealed fragments similar to exons 3, 8, 10, 12 and 14. Attempts to annotate the full coding sequence with ProSplign resulted in an annotation with at least five internal stop codons. The region spanning the putative exons 3-14 is therefore proposed to represent an *ARR3* pseudogene (bright red). Note that the contig is ungapped in this region. The picture was generated with the Pre!Ensembl genome browser. ID - identity; kb - kilobases.

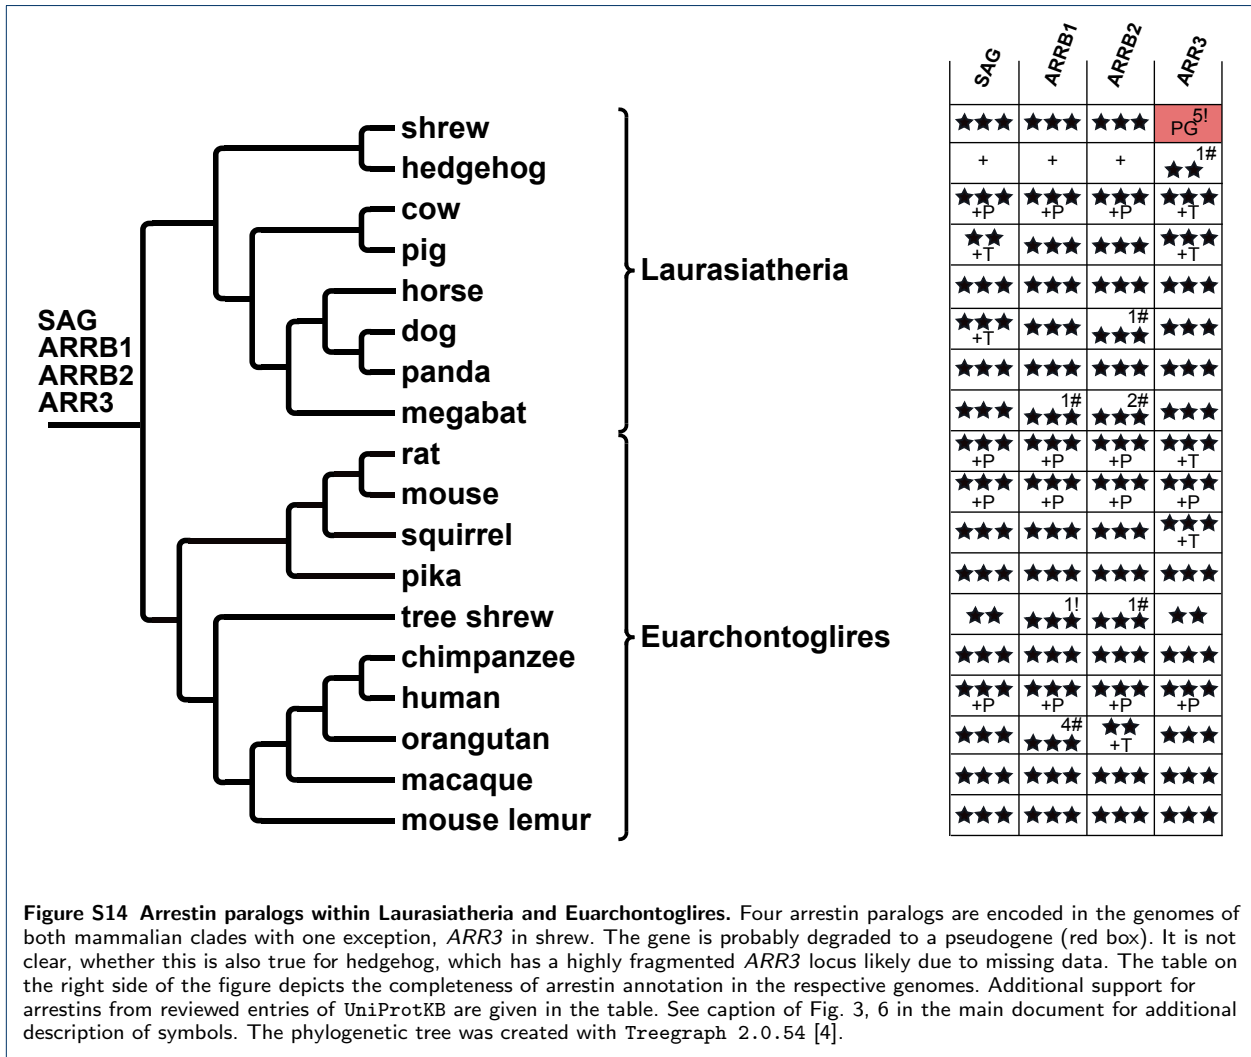

**Figure S14 Arrestin paralogs within Laurasiatheria and Euarchontoglires.** Four arrestin paralogs are encoded in the genomes of both mammalian clades with one exception, *ARR3* in shrew. The gene is probably degraded to a pseudogene (red box). It is not clear, whether this is also true for hedgehog, which has a highly fragmented *ARR3* locus likely due to missing data. The table on the right side of the figure depicts the completeness of arrestin annotation in the respective genomes. Additional support for arrestins from reviewed entries of UniProtKB are given in the table. See caption of Fig. 3, 6 in the main document for additional description of symbols. The phylogenetic tree was created with Treegraph 2.0.54 [4].

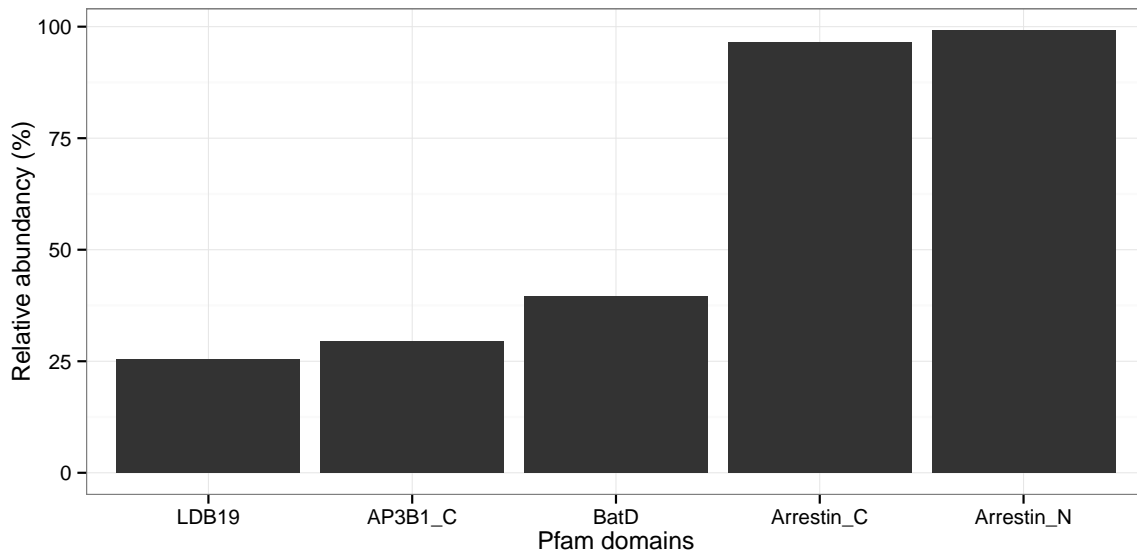

**Figure S15 Pfam domains in deuterostome arrestins.** All deuterostome arrestins (excluding pseudogenes and fragments of *ARRB2* in birds) were scanned against the Pfam 28.0 database [5]. The relative abundance of domains, present in at least 25% of all deuterostome arrestins, is shown.

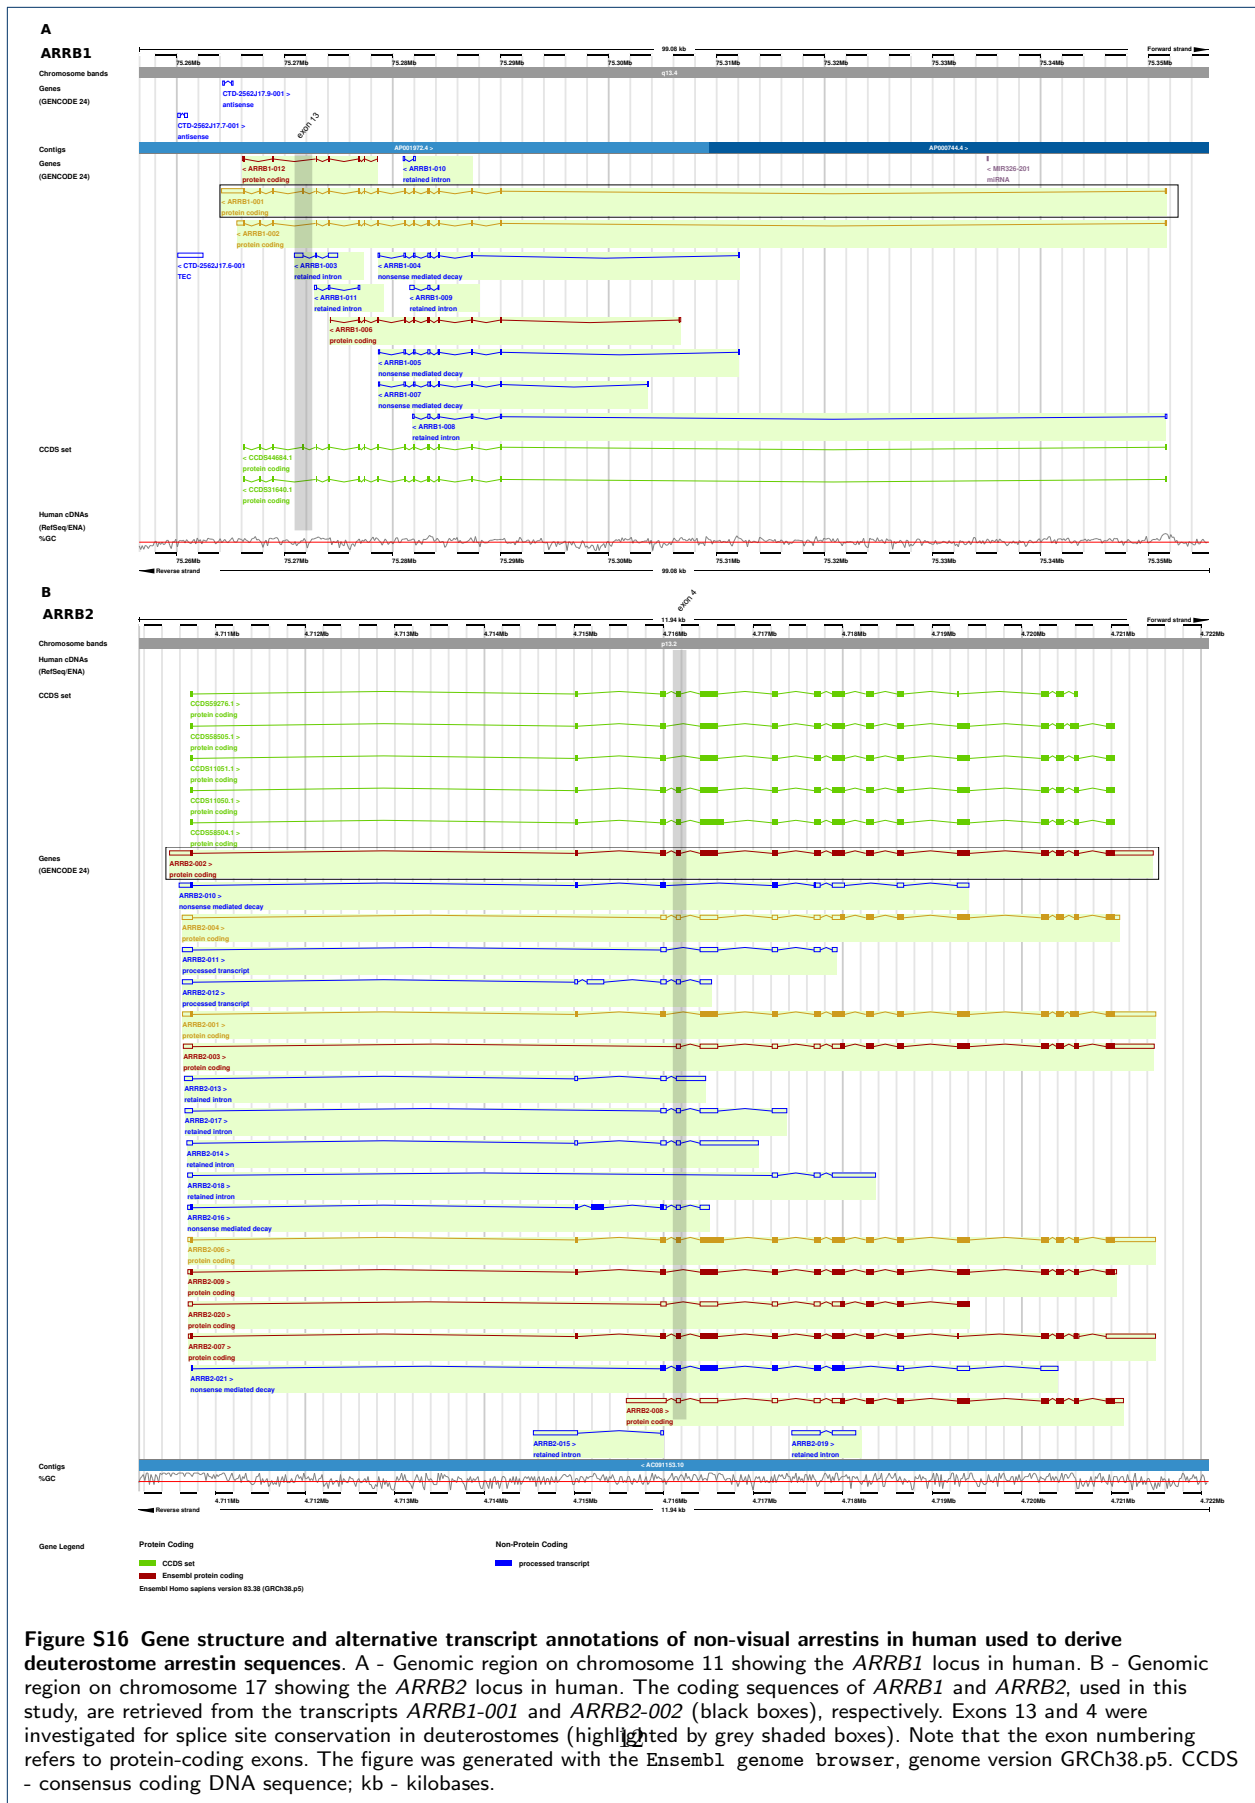

**Figure S16 Gene structure and alternative transcript annotations of non-visual arrestins in human used to derive deuterostome arrestin sequences.** A - Genomic region on chromosome 11 showing the *ARRB1* locus in human. B - Genomic region on chromosome 17 showing the *ARRB2* locus in human. The coding sequences of *ARRB1* and *ARRB2*, used in this study, are retrieved from the transcripts *ARRB1-001* and *ARRB2-002* (black boxes), respectively. Exons 13 and 4 were investigated for splice site conservation in deuterostomes (highlighted by grey shaded boxes). Note that the exon numbering refers to protein-coding exons. The figure was generated with the Ensembl genome browser, genome version GRCh38.p5. CCDS - consensus coding DNA sequence; kb - kilobases.

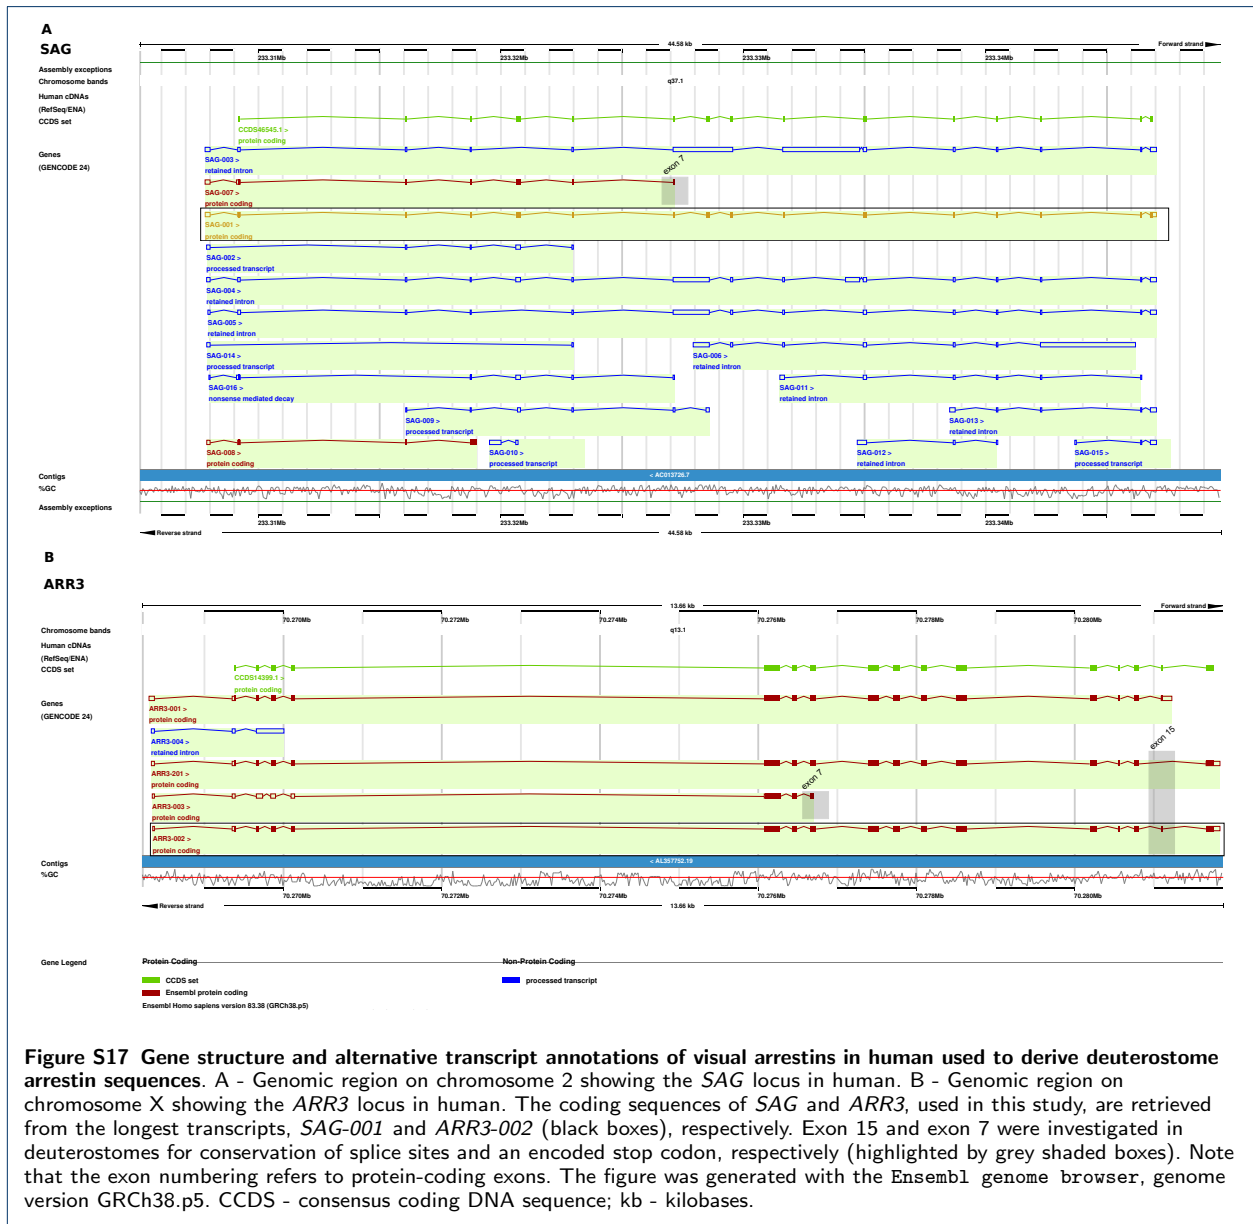

## Appendix 1 — Arrestin inventories in lampreys

While two non-visual arrestins were annotated without difficulty in the arctic lamprey, annotation of visual arrestins turned out to be problematic. The putative locus of *ARR3* was extremely fragmented with 12 exons situated on six different contigs. Nevertheless, predictions were consistent with the results of [6], who cloned one non-visual arrestin and one visual arrestin from arctic lamprey’s pineal organ. Investigation of the germline genome of river lamprey retrieved these three 1:1 orthologs as well as a river lamprey specific non-visual paralog (Fig. 8, Fig. 4 in main document). This arrestin is most similar to *ARRB1* and might have arisen from an independent gene duplication event. The sequence of the other non-visual arrestin corresponds to the single arrestin gene that was detected in the liver tissue genome of the same species. The apparent discrepancy in the number of arrestin paralogs in germline and liver tissue of river lamprey might be ascribed to programmed loss of germline DNA in somatic cells, which has been postulated to pertain 20% of the germline DNA including protein-coding DNA [7].

Apart from those paralogs, we detected some more exons in the germline genomes of both lamprey species that seem to belong to arrestins and share highest similarity to exons of non-visual arrestins. We could not identify any exons orthologous to *SAG* in either lamprey genome unambiguously. Thus, the arrestin inventory for lampreys remains incomplete.

## Appendix 2 — Annotation of arrestins in cartilaginous fish

In the ghost shark genome, only three exons of non-visual arrestins were detected. To verify their existence, we complemented the genomic data by searching the NCBI **Expressed Sequence Tag (EST)** and NCBI **transcriptome shotgun assembly (TSA)** database for cartilaginous fish. We identified homologs of both *ARRB1* and *ARRB2* for two species of Elasmobranchii (catshark, little skate) and for one species of Chimaera (ghost shark).

In order to elucidate, whether the duplication of *SAG* is chimaera-specific or shared with Elasmobranchii, the highly fragmented genome (26x) of the little skate was also investigated. Within this genome, only fragments of arrestins (1-4 exons) were found to be situated on the same genomic fragment. As the exon-intron structure is highly conserved among vertebrate arrestin paralogs, the number of confident, but different hits of one exon-family of sufficient length can be taken as an estimate for the number of paralogs within the species. In little skate, five complete and one partial exon 5 were detected with *E*-values  $\leq 1.4e - 05$ , whereby the incomplete exon 5 was located at the end of contig **AESE011046971.1**. The observation of at least five paralogs is further supported by the detection of five reliable sequences for exons 3 and 9 each (*E*-values  $\leq 4.4e - 07$  and  $\leq 1.9e - 04$ , respectively). To finally confirm that the additional paralog is in fact a second *SAG* paralog, a neighbor joining tree of exon 5 from little skate, spotted gar and ghost shark was constructed on nucleotide level using **ClustalW 2.0.12** [8]. As expected, one exon 5 sequence from little skate clustered together with *SAG.1* and *SAG.2* from ghost shark respectively, forming a monophyletic group with *SAG* from spotted gar (Fig. 9).

## Appendix 3 — Evolution of visual arrestins in different orders of teleosts

As apparent from inspection of the multiple correspondence analysis (MCA), *SAGb* and *ARR3b* of different teleost orders show systematic differences within their respective monophyletic groups.

Visual inspection of the MCA shows that Otomorpha *SAGb*s form a sub-group within teleost *SAGb*. This subdivision in Otomorpha and Euteleostomorpha is also apparent upon inspection of the low affinity IP6 binding site (Fig. 7 A in main document). Here, the positively charged residue R167, which is part of that motif, was substituted by a neutrally or negatively charged amino acid in Euteleostomorpha *SAGb* (E, Q, A) [9]. In Otomorpha *SAGb*, all *SAGa* and *SAG* of spotted gar, the positively charged arginine is conserved. A neighboring residue (165) was converted to arginine in the teleost *SAGa* stem lineage, while this position

is occupied by negatively or neutrally charged amino acids in *SAGb* (Q, C, D). This is further confirmed by the fact that 13% of sites of *SAGb* evolve under positive selection in the ancestral branch leading to the sister group Acanthopterygii (Euteleostomorpha without cod; see Additional file 2).

Similarly to *SAGbs*, *ARR3bs* of Otomorpha cluster closer together than the other teleost *ARR3bs*. Concerning receptor binding residues, Euteleostomorpha *ARR3b* show different patterns from all other teleost *ARR3* sequences (e.g. pos. 76, 246, 248, 254, Fig. 7 D in main document). 14% of *ARR3b*'s residues evolved under positive selection in the ancestral branch leading to Euteleostomorpha (e.g. pos. 254, see Additional file 2). Differences in Euteleostomorpha *ARR3b* are also apparent in phosphate sensing residues as *ARR3a* possesses one or two additional positive charges in the sequence stretch that mediates low affinity IP6 binding in *SAG* (K152 or K154 and K157, Fig. 7 C in main document, [9]). Otomorpha *ARR3b* have intermediate properties (conserved K157) and form a subgroup within teleost *ARR3b*. The low affinity IP6 binding site is conserved in all vertebrate *ARR3* otherwise, although IP6 binding has not been characterized yet experimentally.

#### Appendix 4 — Investigation of the *ARR3* locus in Afrotheria, Xenarthra and common shrew

##### *Elephant*

The elephant *ARR3* gene shares the exon-intron structure with its human arrestin ortholog. Fragments of the protein sequence show 61% identity to the human ortholog (Fig. 10). All other placental *ARR3* share a sequence identity of more than 80% with the human and horse *ARR3* translation product. In human, the genes *P2RY4* and *AWAT1* are situated upstream of the *ARR3* gene, and *RAB41* and *PDZD11* downstream, respectively. Synteny is conserved in comparison to other mammals with the genes *AWAT1* and *PDZD11* located upstream and downstream of the *ARR3* pseudogene in elephant, respectively. Even under the assumption of non-canonical splice sites, the best annotation of elephant *ARR3* encodes for six stop codons within the putative protein-coding sequence. It is thus unlikely that the gene codes for a functional full-length arrestin. If so, additionally, mutations in key functional elements occurred e.g. in the polar core (D297Y) or in residues important for receptor specificity (C282F, T259/261).

##### *Hyrax*

In contrast to elephant, sequence in between *AWAT1* and *PDZD11* is not completely covered in the genome of hyrax (Fig. 11). Nevertheless, some sequence clearly shows similarity to exons 8-10, 12, 14 and 16 of *ARR3* with 26% identity to the human *ARR3* query. Although sequence in between exons 12 and 14 is completely sequenced, exon 13 cannot be identified by homology search. In conclusion, this points at a degradation of *ARR3* to pseudogenes in both investigated Paenungulata genomes, elephant and hyrax.

##### *Armadillo*

In armadillo, *P2RY4* and *PDZD11* are situated on the same contig, JH563233, about 16.5 kb apart (Fig. 12 A). The loss of *ARR3* in armadillo is supported by two facts: (1) The single blast hit that was obtained for this locus with the nucleotide sequence of the elephant *ARR3* pseudogene and the bovine *ARR3* gene as queries, has a low similarity towards the queries (Fig. 12 A). (2) The locus between *P2RY4* and *PDZD11* is shortened in comparison to the length of the *ARR3* gene in mammals (e.g. 22 kb in human). The `tblastn` search against the whole genome of armadillo with *ARR3* from cow as query retrieved one hit that did not overlap with other annotated arrestin loci (*E*-value 1e-1), but with the novel protein-coding gene ENSDN0T00000049106. This gene was annotated by the Ensembl gene prediction pipeline and has the arrestin\_N domain (PF00339) (Fig. 12 B). Nevertheless, the locus can be excluded as (1) the exon-intron structure is not conserved in comparison to other placental *ARR3*, (2) annotation of a stop codon and several

frame shifts would be necessary, (3) sequence identity to *ARR3* in horse is extremely low with 36%.

### Others

In the three other investigated xenarthran and afrotherian genomes, the neighboring genes are either situated on different genomic fragments (sloth and armadillo) or are lost to Ns (tenrec). No hits were retrieved for *ARR3* in the genomes of armadillo, tenrec and sloth. An independent degradation of *ARR3* was detected in the genome of common shrew (Fig. 13, 14). The region between the genes *PDZD11* and *P2RY4* contains fragments that have some similarity to exons 3, 8, 10, 12 and 14 of *ARR3* of other mammals. Annotation with ProSplign retrieved a degraded gene that encodes for at least five stop codons within exons, has no start and stop codon. While exons 1 and 2 could possibly be situated in a region of Ns, the stretch between fragments of exons 3-14 is fully encoded supporting the annotation as a pseudogene.

### Appendix 5 — Investigation of loss of *ARRB2* in Sauropsids

In order to assign exons to arrestin-3 (*ARRB2* gene) within birds, complete amino acid sequences of the four paralogs of close relatives were each blasted against the respective bird genomes using `blastall 2.2.26` with the `-p tblastn` option. Contigs and scaffolds will be called genomic fragments in the following. The hits were sorted by *E*-value and the genomic fragments were assigned to the paralog, that obtained the highest scoring blast hit on that genomic fragment. Paralogs were checked for completeness. Usually, *SAG*, *ARR3* and *ARRB1* were almost completely situated on one genomic fragment and included in the respective annotation. All hits that were not assigned to any of the other three arrestins regardless of which arrestin protein query retrieved the hit, were inspected again manually to clarify whether they belonged to *ARRB2* (Additional file 2, bird annotations).

Additionally, the nucleotide sequence of *ARRB2* exons identified in the kiwi genome was blasted against the NCBI `short read archive` (SRA) of close relatives, ostrich and tinamou. The same was repeated for the SRA of gold eagle and white-tailed eagle with bald eagle *ARRB2* exons as query. This approach retrieved exons that were not recovered from the assembled genomes with `tblastn` otherwise, pointing to problems with the assembly of these bird genomes.

As evidence for *ARRB2* was very sparse after conventional homology search on genomic level, the approach was extended to include: (1) homology search for genes assumed to be neighbors of *ARRB2* (i.e. synteny information) to detect cases of loss and pseudogenization events and, (2) homology search for *ARRB2* in available bird transcriptome/EST data. First, syntenic information had to be inferred from the *ARRB2* locus in other species. Whenever syntenic information was available for the investigated mammalian genomes, *Med11* and *Pelp1* were found to be neighbors of *ARRB2*, oriented head to tail of *ARRB2* and head to head of *ARRB2*, respectively. Within sauropsids (birds and reptiles) the head to tail neighborhood to *Med11* is supported by alligator, while the head to head neighborhood to *Pelp1* is supported by genomic information from turtle, python and frog. In most other cases, syntenic information was not available due to a low assembly/sequencing status of the respective genomes. Furthermore, *Med11* was also found next to *ARRB2* in the genome of coelacanth, the outgroup to sauropsids and mammals. This suggests that *ARRB2* was located between *Med11* and *Pelp1* in the last common ancestor of lobe-finned fish and a conservation of this linkage throughout lobe-finned fish. In this study, only *ARRB2* in frog was found to have the gene *DDX27* as a neighbor in place of *Med11*. The latter was found in a completely different gene neighborhood, which might be the result of an amphibian-specific rearrangement. None of the potential neighboring genes, *Med11* or *Pelp1*, was detected in the genomes of the investigated bird species or in lizard.

Second, the genome-focused approach was complemented using specific bird transcriptome data sets (Table 2). Data from three sources for zebrafish and chicken, and the EST and TSA database of birds, were queried



with known *ARRB2*s. Whole or partial hits were retrieved for *SAG*, *ARRB1* or *ARR3*, while in general no hits were retrieved for *ARRB2*. Within the investigated chicken ovary expression data [10], some fragments were recovered that could not be assigned to neither *ARRB1* nor *ARRB2* unambiguously, but were similar to a non-visual arrestin.

#### Appendix 6 — Domains of deuterostome arrestins

Apart from the arrestin\_C and arrestin\_N domains, the following other domains were detected in more than 25% of the deuterostome arrestins: BatD, a membrane spanning protein connected to oxygen tolerance in bacteria, the clathrin-adaptor complex 3 beta 1 subunit C terminal domain (AP3B1\_C) and the arrestin\_N terminal like domain (LDB19), which belongs to the arrestin N-like clan (Fig. 15). The domains were not specific for certain orthology groups. For AP3B1\_C, all obtained hits had a conditional *E*-value < 9.4e-05 and covered 19-47% of the profile. Mapped onto arrestins, the domain overlapped with the beginning of the arrestin\_C domain and covered residues that are known to be involved in microtubule, calmodulin and phosphodiesterase binding (residues 192-237 in bovine *ARRB1*). AP3B1 is part of the adapter protein-complex and interacts with clathrin via a clathrin binding motif as does arrestin.

#### Appendix 7 — Isoforms and changes of the conserved exon-intron structure

Conservation of cassette exons and short isoforms was investigated, if this behavior appeared systematically in different isoforms of the same paralog (skipping of exon 13 in *ARRB1*, skipping of exon 4 in *ARRB2*) or across paralogs (stop after exon 7 in *SAG* and *ARR3*) as annotated in the **Ensembl genome browser** for human (Fig. 16, 17). Skipping of exon 15 as seen in *ARR3* was additionally considered as this exon encodes the major clathrin binding site. All results are also available in tabular format in Additional file 2, Possible isoforms.

##### *Skipping of exon 15*

In both visual arrestins, exon 15 is extremely shortened to only 10 to 16 nt in comparison to exon 15 of *ARRB1* which has a length of 51 nt in human and contains the major clathrin binding site. Despite variation in the length of exon 15, the extension of exon 14 to the next downstream canonical splice site allows skipping of exon 15 under preservation of the reading frame, with the exception of *SAG* in fish and *ARR3* in coelacanth. The other visual arrestin, *ARR3*, in fish showed loss of exon 15/16 supported by the **Ensembl** gene annotation and mRNA sequence [11]. However, presence or absence of exon 15 remains unresolved for some mammals. This is due to the fact that exon 15 is extremely short and can show high sequence variation impeding detection by homology search.

##### *Stop after exon 7*

EST data from **Ensembl** for *SAG* and *ARR3* supported the existence of an extremely shortened isoform in human (Fig. 17). In this isoform, exon 7 is extended into intron 161b towards an encoded stop codon. The genomic data showed that this stop codon downstream of exon 7 is conserved in *SAG* of all deuterostomes, in mammalian and sauropsid *ARRB1* and in mammalian *ARRB2*. It is only loosely conserved in fish *ARRB1* and *ARRB2*. Unexpectedly, for *ARR3*, the stop codon shows a dispersed absence/presence pattern in these three clades. As the premature stop is conserved in *ARR0* of lancelet and vase tunicate, this stop codon was acquired during early chordate evolution with subsequent losses and re-acquisitions in specific classes.

### *Skipping of exon 4 and exon 13*

Exons 4 and 13 are spliced out in specific isoforms of *ARRB2* and *ARRB1* in human, respectively. The length of exons 4 and 13 on nucleotide level and the respective reading frames are conserved in all paralogs suggesting that these exons could be skipped in all investigated chordates. An exception is exon 15 in the river lamprey specific non-visual arrestin. Exon 4 has several residues contributing to receptor binding and specificity. Interestingly, exon 4 is fused to exon 5 in all echinoderms and hemichordates precluding this isoform.

### *Deviations in the conserved exon-intron structure*

In general, all paralogs have a highly conserved exon-intron structure with only few exceptions. Apart from the exceptions mentioned above, these changes concern the fusion of exons 14 and 15 in *ARRB2* from panda, and the loss of exon 13 in *ARRB1* from ibis (Fig. 10 B in main document). As sequence data is fully available in the intronic region between exons 12 and 14 in ibis, exon 13 and thus the minor clathrin binding site is probably lost in this bird. Within Euteleostomorpha, exon 5 of *ARRB2a* is split into two exons, while exons 6 and 7 are fused in Otomorpha *ARRB2b*. All duplicated fish lost exon 16 of *ARR3* and possess a shortened exon 15. Conceptual translation thus results in a C-terminally shortened *ARR3*. Furthermore, exons 12 and 13 of Otomorpha *ARR3b* are fused resulting in a gene structure with 14 protein-coding exons. No homolog of exon 16 could be detected for ghost shark *SAG.2* hinting at a loss of exon 16.

### Appendix 8 — Parsimonious reconstruction of intron gain/loss events

Exons are numbered according to human *ARRB1* with homologous exons sharing the same number (see Fig. 10 A in main document). A maximum parsimony reconstruction of intron loss and gain events points to hotspots at positions 85c (five independent intron gains), at 138c (three independent events), 235a (two independent events) and 365a (two independent intron losses) (Fig. 10 B, C in main document). All other changes probably represent single events of intron gain or loss. As the above mentioned events must have taken place several times, several scenarios exist with the same number of events (intron gains and losses). We minimize the number of events without resolving whether these are actually intron gains or losses considering the ongoing and unresolved discussion about introns-late vs. introns-early concepts [12]. For counting the number of events, the root state was hypothesized to be the same as in fruit fly’s phosrestin-1 (*Drosophila melanogaster*) and roundworm arrestin (*Caenorhabditis elegans*), which have no introns at the named hotspots, with exception of intron 138c in roundworm.

### Appendix 9 — Annotation of arrestins in mammals

We started annotation of arrestin homologs based on the arrestin reference sequences in UniProtKB. These correspond to the well characterized and on transcriptome level supported annotations of the longest isoforms of three of the four arrestin paralogs in human retrieved from Ensembl ([13], Fig. 16, 17). First, annotation of arrestin homologs in 13 different mammalian orders were systematically completed. Second, an initial alignment was built from these sequences. To do so, query protein sequences were blasted against the respective genome of interest using `tblastn` on the Ensembl web interface [14]. Missing short exons were retrieved using local `tblastn` or `blastn` (`bl2seq` 2.2.26,  $E$ -value < 1) and the spliced alignment tool `ProSplice` [15]. The reference sequence for *ARRB2* (409 AA) does not contain the 22 AA extension of exon 5 seen in the longest isoform in human ([13], Fig. 16).

Table S1: **List of genomes used for the current study.** Latin and trivial names are provided together with the version used and source of investigated assemblies. Additionally, all other 39 genomes from the Avian genomics project were investigated.

| Latin name                        | Trivial name    | Genome version | Genome source               |
|-----------------------------------|-----------------|----------------|-----------------------------|
| <i>Homo sapiens</i>               | human           | GRCh38         | Ensembl                     |
| <i>Monodelphis domestica</i>      | opossum         | monDom5        | Ensembl                     |
| <i>Tupaia belangeri</i>           | tree shrew      | tupBel1        | Ensembl                     |
| <i>Ictidomys tridecemlineatus</i> | squirrel        | spetri2        | Ensembl                     |
| <i>Erinaceus europaeus</i>        | hedgehog        | eriEur1        | Ensembl                     |
| <i>Loxodonta africana</i>         | elephant        | Loxaf3.0       | Ensembl                     |
| <i>Dasyopus novemcinctus</i>      | armadillo       | Dasnov3.0      | Ensembl                     |
| <i>Ornithorhynchus anatinus</i>   | platypus        | OANA5          | Ensembl                     |
| <i>Pongo abelii</i>               | orangutan       | PPYG2          | Ensembl                     |
| <i>Pan troglodytes</i>            | chimpanzee      | CHIMP2.1.4     | Ensembl                     |
| <i>Equus caballus</i>             | horse           | Equ Cab 2      | Ensembl                     |
| <i>Sarcophilus harrisii</i>       | Tasmanian devil | Devil_ref v7.0 | Ensembl                     |
| <i>Procavia capensis</i>          | hyrax           | proCap1        | Ensembl                     |
| <i>Echinops telfairi</i>          | tenrec          | TENREC         | Ensembl                     |
| <i>Bos taurus</i>                 | cow             | UMD3.1         | Ensembl                     |
| <i>Sus scrofa</i>                 | pig             | Sscrofa10.2    | Ensembl                     |
| <i>Pteropus vampyrus</i>          | megabat         | pteVam1        | Ensembl                     |
| <i>Ailuropoda melanoleuca</i>     | panda           | ailMel1        | Ensembl                     |
| <i>Macaca mulatta</i>             | macaque         | MMUL 1.0       | Ensembl                     |
| <i>Choloepus hoffmanni</i>        | sloth           | choHof1        | Ensembl                     |
| <i>Orycteropus afer afer</i>      | aardvark        | OryAfe1.0      | Pre!Ensembl/GCA_000298275.1 |
| <i>Macropus eugenii</i>           | wallaby         | Meug_1.0       | Ensembl                     |
| <i>Sorex araneus</i>              | shrew           | sorAra2.0      | Pre!Ensembl/GCA_000181275.2 |
| <i>Microcebus murinus</i>         | mouse lemur     | micMur1        | Ensembl                     |
| <i>Mus musculus</i>               | mouse           | GRCm38.p1      | Ensembl                     |
| <i>Rattus norvegicus</i>          | rat             | Rnor_5.0       | Ensembl                     |
| <i>Ochotona princeps</i>          | pika            | OchPri3        | Pre!Ensembl/GCA_000292845   |
| <i>Canis familiaris</i>           | dog             | CanFam3.1      | Ensembl                     |
| <i>Meleagris gallopavo</i>        | turkey          | Turkey_2.01    | Ensembl                     |
| <i>Meleagris gallopavo</i>        | turkey          | Turkey_5.0     | NCBI/GCF_000146615.2        |
| <i>Anas platyrhynchos</i>         | duck            | BGI_duck_1.0   | Ensembl                     |
| <i>Taeniopygia guttata</i>        | zebra finch     | taeGut3.2.4    | Ensembl                     |
| <i>Aquila chrysaetos</i>          | golden eagle    | v1.0.2         | NCBI/GCF_000766835.1        |
| <i>Apteryx australis mantelli</i> | kiwi            | v1.0           | NCBI/GCF_001039765.1        |
| <i>Anolis carolinensis</i>        | anole lizard    | AnoCar2.0      | Ensembl                     |
| <i>Xenopus tropicalis</i>         | frog            | JGI 4.2        | Ensembl                     |
| <i>Pelodiscus sinensis</i>        | turtle          | PelSin_1.0     | Ensembl                     |
| <i>Gallus gallus</i>              | chicken         | Galgal4        | Ensembl                     |

Continued on next page

**Table S1– continued from previous page**

| Latin name                           | Trivial name      | Genome version  | Genome source                                                                                           |
|--------------------------------------|-------------------|-----------------|---------------------------------------------------------------------------------------------------------|
| <i>Latimeria chalumnae</i>           | coelacanth        | LatCha1         | Ensembl                                                                                                 |
| <i>Lepisosteus oculatus</i>          | spotted gar       | LepOcu1         | Ensembl                                                                                                 |
| <i>Python molurus bivittatus</i>     | python            | Python 5.0.2    | NCBI/GCA_000186305.2                                                                                    |
| <i>Alligator mississippiensis</i>    | alligator         | v0.1d27         | ftp://ftp.crocgenomes.org/pub/ICGGW/Genome_drafts/alligator.old/amiss_v0.1d27/amiss_v0.1d27.fa          |
| <i>Cuculus canorus</i>               | cuckoo            | v1.0            | http://avian.genomics.cn/en/jsp/database.shtml                                                          |
| <i>Haliaeetus leucocephalus</i>      | bald eagle        | v1.0            | http://avian.genomics.cn/en/jsp/database.shtml                                                          |
| <i>Opisthocomus hoazin</i>           | hoatzin           | v1.0            | http://avian.genomics.cn/en/jsp/database.shtml                                                          |
| <i>Nipponia nippon</i>               | ibis              | v1.0            | http://avian.genomics.cn/en/jsp/database.shtml                                                          |
| <i>Struthio camelus</i>              | ostrich           | v1.0            | NCBI/GCA_000698965.1                                                                                    |
| <i>Gadus morhua</i>                  | cod               | gadMor1         | Ensembl                                                                                                 |
| <i>Takifugu rubripes</i>             | pufferfish        | FUGU4           | Ensembl                                                                                                 |
| <i>Oreochromis niloticus</i>         | tilapia           | Orenil1.0       | Ensembl                                                                                                 |
| <i>Oryzias latipes</i>               | medaka            | MEDAKA1         | Ensembl                                                                                                 |
| <i>Xiphophorus maculatus</i>         | platyfish         | Xipmac4.4.2     | Ensembl                                                                                                 |
| <i>Gasterosteus aculeatus</i>        | stickleback       | BROADS1         | Ensembl                                                                                                 |
| <i>Astyanax mexicanus</i>            | cave fish         | AstMex102       | Ensembl                                                                                                 |
| <i>Danio rerio</i>                   | zebrafish         | Zv9             | Ensembl                                                                                                 |
| <i>Callorhynchus milii</i>           | ghost shark       | calMil1.fa      | UCSC (calMil1.fa.gz)                                                                                    |
| <i>Leucoraja erinacea</i>            | little skate      | v1.0            | NCBI/GCA_000238235.1                                                                                    |
| <i>Ciona intestinalis</i>            | vase tunicate     | JGI2            | Ensembl                                                                                                 |
| <i>Petromyzon marinus</i>            | river lamprey     | Pmarinus_7.0    | Ensembl                                                                                                 |
|                                      |                   | germline genome | personal communication (Chris Amemiya, April 2016)                                                      |
| <i>Lethenteron camtschaticum</i>     | arctic lamprey    | v1.0            | NCBI/GCA_000466285.1                                                                                    |
| <i>Branchiostoma floridae</i>        | lancelet          | Brafl1_v2.0     | http://genome.jgi-psf.org/Brafl1/Brafl1.download.html<br>Branchios-toma_floridae_v2.0.assembly.fasta.gz |
| <i>Strongylocentrotus purpuratus</i> | purple sea urchin | Spur_3.1        | Ensembl Metazoa                                                                                         |
| <i>Patiria miniata</i>               | bat star          | v1.0            | http://www.echinobase.org/Echinobase/PmDownload(pmin.scaf.fa)                                           |
| <i>Lytechinus variegatus</i>         | green sea urchin  | v0.4            | http://www.echinobase.org/Echinobase/LvDownload(Lvar_0.4.20110428.linear.fa)                            |

Continued on next page

**Table S1**– continued from previous page

| Latin name                      | Trivial name | Genome version | Genome source                                                                                                       |
|---------------------------------|--------------|----------------|---------------------------------------------------------------------------------------------------------------------|
| <i>Saccoglossus kowalevskii</i> | acorn worm   | JGI3.0         | ftp://ftp.jgi-psf.org/<br>pub/compgen/metazome/v3.0/<br>Skowalevskii/assembly/<br>Saccoglossus_kowalevskii_v3.fasta |

**Table S2: List of additional omics data used for the current study.** Latin and trivial names as well as accession numbers are given for data sets that were investigated on top of the NCBI EST and TSA database.

| Latin name                   | Trivial name | GEO accession/<br>version | Transcriptome source                                                                                               |
|------------------------------|--------------|---------------------------|--------------------------------------------------------------------------------------------------------------------|
| <i>Callorhynchus milii</i>   | ghost shark  | GSM643959                 | http://esharkgenome.imcb.a-star.edu.sg                                                                             |
| <i>Leucoraja erinacea</i>    | little skate | GSM643957                 | http://www.skatebase.org/<br>downloads                                                                             |
| <i>Scyliorhinus canicula</i> | catshark     | GSM643958                 | http://www.skatebase.org/<br>downloads                                                                             |
| <i>Gallus gallus</i>         | chicken      | [20]                      | http://www.chickest.udel.edu                                                                                       |
| <i>Taeniopygia guttata</i>   | zebra finch  | [21]<br>[22]              | http://songbirdtranscriptome.net/<br>http://titan.biotec.uiuc.edu/cgi-bin/ESTWebsite/estima_start?seqSet=songbird3 |

**Author details**

**References**

1. Felsenstein, J.: PHYLIP (Phylogeny Inference Package): version 3.2 (20.10.2015). <http://evolution.genetics.washington.edu/phylip/faq.html> Accessed 03.05.2017
2. Kumar, S., Stecher, G., Suleski, M., Hedges, S.B.: TimeTree: A Resource for Timelines, Timetrees, and Divergence Times. *Molecular biology and evolution* **34**(7), 1812–1819 (2017). doi:10.1093/molbev/msx116
3. Huson, D.H., Scornavacca, C.: Dendroscope 3: an interactive tool for rooted phylogenetic trees and networks. *Systematic biology* **61**(6), 1061–1067 (2012). doi:10.1093/sysbio/sys06
4. Stover, B.C., Muller, K.F.: TreeGraph 2: combining and visualizing evidence from different phylogenetic analyses. *BMC bioinformatics* **11**, 7 (2010). doi:10.1186/1471-2105-11-
5. Finn, R.D., Bateman, A., Clements, J., Coggill, P., Eberhardt, R.Y., Eddy, S.R., Heger, A., Hetherington, K., Holm, L., Mistry, J., Sonnhammer, E.L.L., Tate, J., Punta, M.: Pfam: the protein families database. *Nucleic acids research* **42**(Database issue), 222–30 (2014). doi:10.1093/nar/gkt122
6. Kawano-Yamashita, E., Koyanagi, M., Shichida, Y., Oishi, T., Tamotsu, S., Terakita, A.: beta-arrestin functionally regulates the non-bleaching pigment parainopsin in lamprey pineal. *PLoS one* **6**(1), 16402 (2011). doi:10.1371/journal.pone.001640
7. Smith, J.J., Baker, C., Eichler, E.E., Amemiya, C.T.: Genetic consequences of programmed genome rearrangement. *Current biology : CB* **22**(16), 1524–1529 (2012). doi:10.1016/j.cub.2012.06.02
8. Larkin, M.A., Blackshields, G., Brown, N.P., Chenna, R., McGettigan, P.A., McWilliam, H., Valentin, F., Wallace, I.M., Wilm, A., Lopez, R., Thompson, J.D., Gibson, T.J., Higgins, D.G.: Clustal W and Clustal X version 2.0. *Bioinformatics (Oxford, England)* **23**(21), 2947–2948 (2007). doi:10.1093/bioinformatics/btm40
9. Zhuang, T., Vishnivetskiy, S.A., Gurevich, V.V., Sanders, C.R.: Elucidation of inositol hexaphosphate and heparin interaction sites and conformational changes in arrestin-1 by solution nuclear magnetic resonance. *Biochemistry* **49**(49), 10473–10485 (2010). doi:10.1021/bi101596
10. Boardman, P.E., Sanz-Ezquerro, J., Overton, I.M., Burt, D.W., Bosch, E., Fong, W.T., Tickle, C., Brown, W.R.A., Wilson, S.A., Hubbard, S.J.: A Comprehensive Collection of Chicken cDNAs. *Current Biology* **12**(22), 1965–1969 (2002). doi:10.1016/S0960-9822(02)01296-
11. Renninger, S.L., Gesemann, M., Neuhauss, Stephan C F: Cone arrestin confers cone vision of high temporal resolution in zebrafish larvae. *The European journal of neuroscience* **33**(4), 658–667 (2011). doi:10.1111/j.1460-9568.2010.07574.

12. Rogozin, I.B., Carmel, L., Csuros, M., Koonin, E.V.: Origin and evolution of spliceosomal introns. *Biology direct* **7**, 11 (2012). doi:10.1186/1745-6150-7-1
13. Flicek, P., Amode, M.R., Barrell, D., Beal, K., Billis, K., Brent, S., Carvalho-Silva, D., Clapham, P., Coates, G., Fitzgerald, S., Gil, L., Girón, C.G., Gordon, L., Hourlier, T., Hunt, S., Johnson, N., Juettemann, T., Kähäri, A.K., Keenan, S., Kulesha, E., Martin, F.J., Maurel, T., McLaren, W.M., Murphy, D.N., Nag, R., Overduin, B., Pignatelli, M., Pritchard, B., Pritchard, E., Riat, H.S., Ruffier, M., Sheppard, D., Taylor, K., Thormann, A., Trevanion, S.J., Vullo, A., Wilder, S.P., Wilson, M., Zadissa, A., Aken, B.L., Birney, E., Cunningham, F., Harrow, J., Herrero, J., Hubbard, T., Hubbard, T. J. P., Kinsella, R., Muffato, M., Parker, A., Spudich, G., Yates, A., Zerbino, D.R., Searle, Stephen M J: Ensembl 2014. *Nucleic acids research* **42**(Database issue), 749–55 (2014). doi:10.1093/nar/gkt119
14. Altschul, S.F., Gish, W., Miller, W., Myers, E.W., Lipman, D.J.: Basic local alignment search tool. *Journal of molecular biology* **215**(3), 403–410 (1990). doi:10.1016/S0022-2836(05)80360-
15. Thibaud-Nissen, F., Souvorov, Alexander Murphy, Terence, DiCuccio, M., Kitts, P.: Eukaryotic Genome Annotation Pipeline, Berthesda (2013). <http://www.ncbi.nlm.nih.gov/books/NBK169439/>
16. Sterne-Marr, R., Gurevich, V.V., Goldsmith, P., Bodine, R.C., Sanders, C., Donoso, L.A., Benovic, J.L.: Polypeptide variants of beta-arrestin and arrestin3. *The Journal of biological chemistry* **268**(21), 15640–15648 (1993)
17. Attramadal, H., Arriza, J.L., Aoki, C., Dawson, T.M., Codina, J., Kwatra, M.M., Snyder, S.H., Caron, M.G., Lefkowitz, R.J.: Beta-arrestin2, a novel member of the arrestin/beta-arrestin gene family. *The Journal of biological chemistry* **267**(25), 17882–17890 (1992)
18. Komori, N., Cain, S.D., Roch, J.M., Miller, K.E., Matsumoto, H.: Differential expression of alternative splice variants of beta-arrestin-1 and -2 in rat central nervous system and peripheral tissues. *The European journal of neuroscience* **10**(8), 2607–2616 (1998)
19. Rapoport, B., Kaufman, K.D., Chazenbalk, G.D.: Cloning of a member of the arrestin family from a human thyroid cDNA library. *Molecular and cellular endocrinology* **84**(3), 39–43 (1992)
20. Carre, W., Wang, X., Porter, T.E., Nys, Y., Tang, J., Bernberg, E., Morgan, R., Burnside, J., Aggrey, S.E., Simon, J., Cogburn, L.A.: Chicken genomics resource: sequencing and annotation of 35,407 ESTs from single and multiple tissue cDNA libraries and CAP3 assembly of a chicken gene index. *Physiological genomics* **25**(3), 514–524 (2006). doi:10.1152/physiolgenomics.00207.200
21. Jarvis, E.D., Smith, V.A., Wada, K., Rivas, M.V., McElroy, M., Smulders, T.V., Carninci, P., Hayashizaki, Y., Dietrich, F., Wu, X., McConnell, P., Yu, J., Wang, P.P., Hartemink, A.J., Lin, S.: A framework for integrating the songbird brain. *Journal of comparative physiology. A, Neuroethology, sensory, neural, and behavioral physiology* **188**(11-12), 961–980 (2002). doi:10.1007/s00359-002-0358-
22. Replogle, K., Arnold, A.P., Ball, G.F., Band, M., Bensch, S., Brenowitz, E.A., Dong, S., Drnevich, J., Ferris, M., George, J.M., Gong, G., Hasselquist, D., Hernandez, A.G., Kim, R., Lewin, H.A., Liu, L., Lovell, P.V., Mello, C.V., Naurin, S., Rodriguez-Zas, S., Thimmapuram, J., Wade, J., Clayton, D.F.: The Songbird Neurogenomics (SoNG) Initiative: community-based tools and strategies for study of brain gene function and evolution. *BMC genomics* **9**, 131 (2008). doi:10.1186/1471-2164-9-13
